# Supplementary material for: Fossil Mice and Rats Show Isotopic Evidence of Niche Partitioning and Change in Dental Ecomorphology Related to Dietary Shift in Late Miocene of Pakistan
Source: PubMed Central journal article supplement (PMC3732283; doi:10.1371/journal.pone.0069308), 2013-08-02
Supplement: pone.0069308.s002.pdf [file pone.0069308.s002.pdf]

## 0.1M acetic acid

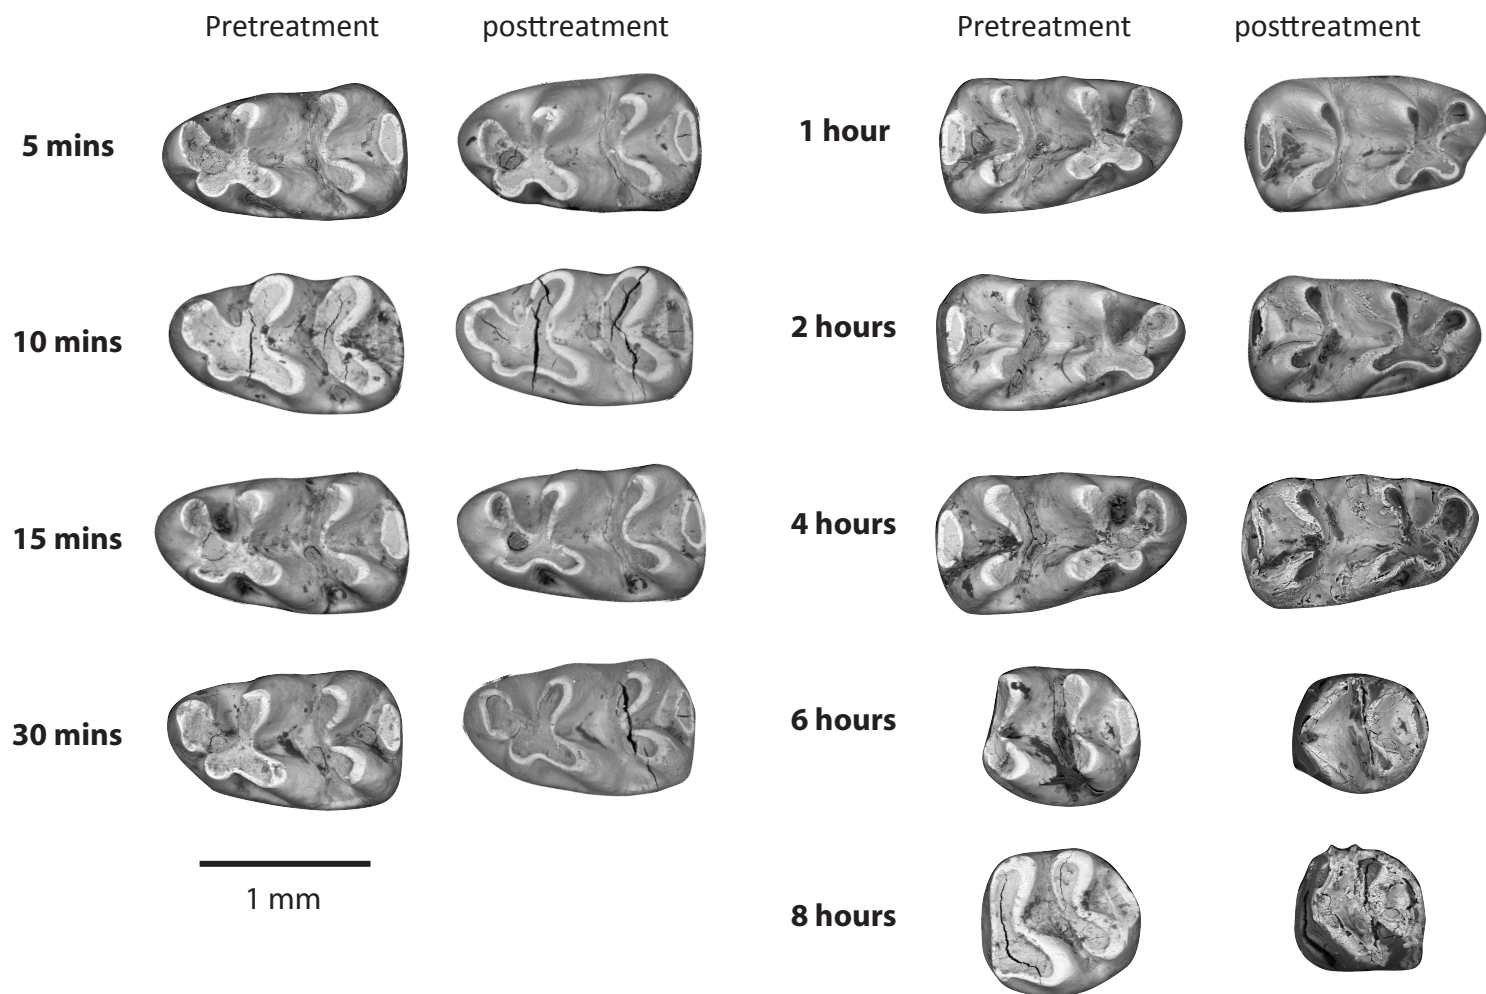

**Figure S2.** SEM images of m1 of laboratory *Mus musculus*, which are treated by 0.1 M acetic acid. The m1 specimens were provided by the University of Texas, Southwestern Medical Center. Individuals were sacrificed for a research purpose unrelated to this study.
