# Supplementary material for: Fossil Mice and Rats Show Isotopic Evidence of Niche Partitioning and Change in Dental Ecomorphology Related to Dietary Shift in Late Miocene of Pakistan
Source: PubMed Central journal article supplement (PMC3732283; doi:10.1371/journal.pone.0069308), 2013-08-02
Supplement: pone.0069308.s004.pdf [file pone.0069308.s004.pdf]

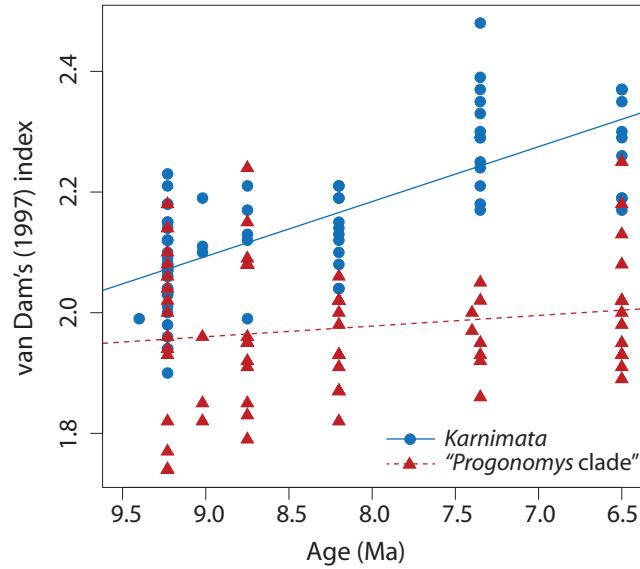

**Figure S4.** Scatter plot of van Dam's (1997) index vs. time, ranging from 9.2 to 6.5 Ma, between *Karnimata* and the "Progonomys clade". Lines show linear regression lines.
