# Supplementary material for: Fossil Mice and Rats Show Isotopic Evidence of Niche Partitioning and Change in Dental Ecomorphology Related to Dietary Shift in Late Miocene of Pakistan
Source: PubMed Central journal article supplement (PMC3732283; doi:10.1371/journal.pone.0069308), 2013-08-02
Supplement: pone.0069308.s008.pdf [file pone.0069308.s008.pdf]

**Table S1.** Key to names of Siwalik murine species used in this study in comparison to Jacobs and Flynn (2005). Major species are those known by five or more specimens of the upper first molars (M1). Minor species are those known by less than five specimens of M1.

| Locality      | Age (Ma) | Jacobs and Flynn (2005)                                                                                          | Major species (n>5 by M1)                                                    | Minor species (n<5 by M1)                                                        |
|---------------|----------|------------------------------------------------------------------------------------------------------------------|------------------------------------------------------------------------------|----------------------------------------------------------------------------------|
| DP13          | 6.5      | <i>Pararoberti robertsi</i><br><i>Karnimata huxleyi</i><br><i>Mus auctor</i>                                     | <i>Pararoberti robertsi</i><br><i>Karnimata huxleyi</i><br><i>Mus auctor</i> |                                                                                  |
| YGSP 581      | 7.2      |                                                                                                                  | <i>Karnimata</i> sp.<br><i>Mus</i> sp.                                       |                                                                                  |
| YGSP 931, 921 | 7.4      | <i>Parapelomys</i> cf. <i>P. robertsi</i><br><i>Karnimata</i> sp.<br><br><i>Mus</i> sp.                          | <i>Karnimata</i> sp.<br><i>Progonomys</i> sp.<br><i>Mus</i> sp.              | <i>Parapelomys</i> sp.                                                           |
| YGSP 457      | 7.4      | <i>Parapelomys</i> cf. <i>P. robertsi</i><br><i>Karnimata</i> sp.<br><br><i>Mus</i> sp.                          | <i>Karnimata</i> sp.<br><i>Progonomys</i> sp.<br><i>Mus</i> sp.              | <i>Parapelomys</i> sp.                                                           |
| YGSP 898      | 7.8      |                                                                                                                  |                                                                              | morphotype 4<br>morphotype 8                                                     |
| YGSP 547      | 8.0      |                                                                                                                  |                                                                              | <i>Parapelomys</i> sp.<br><i>Karnimata</i> sp.<br>morphotype 8<br><i>Mus</i> sp. |
| YGSP 24       | 8.2      | <i>Parapelomys</i> sp.<br><i>Karnimata</i> sp.<br><i>Progonomys</i> sp.                                          | <i>Karnimata</i> sp.<br><i>Progonomys</i> sp.                                | large <i>Karnimata</i> sp.                                                       |
| YGSP 387      | 8.7      |                                                                                                                  |                                                                              | <i>Karnimata</i> sp.<br>morphotype 7<br><i>Progonomys</i> sp.                    |
| YGSP 388      | 8.8      | large <i>Karnimata</i> sp.<br><br><i>Karnimata</i> sp.<br><i>Progonomys</i> sp.                                  | <i>Karnimata</i> sp.<br><i>Progonomys</i> sp.                                | large <i>Karnimata</i> sp.<br>morphotype 4<br>morphotype 7                       |
| YGSP 367      | 9.0      | large <i>Karnimata</i> sp.<br><i>Karnimata darwini</i><br><i>Progonomys debruijini</i>                           | <i>Karnimata darwini</i><br><i>Progonomys debruijini</i>                     |                                                                                  |
| YGSP 182      | 9.2      | <i>Parapodemus</i> sp.<br>large <i>Karnimata</i> sp.<br><i>Karnimata darwini</i><br><i>Progonomys debruijini</i> | <i>Karnimata darwini</i><br><i>Progonomys debruijini</i>                     | <i>Parapodemus</i> sp.<br>large <i>Karnimata</i> sp.                             |
| YGSP 410      | 9.4      |                                                                                                                  | <i>Karnimata darwini</i><br><i>Progonomys debruijini</i>                     |                                                                                  |
| YGSP 311      | 10.1     | <i>Karnimata</i> sp.<br><i>Progonomys</i> sp.<br>unnamed sp.                                                     | <i>Karnimata</i> sp.<br><i>Progonomys</i> sp.                                | morphotype 2                                                                     |
| YGSP 450      | 10.2     | <i>Karnimata</i> sp.<br><i>Progonomys</i> sp.                                                                    | <i>Karnimata</i> sp.<br><i>Progonomys</i> sp.                                |                                                                                  |
| YGSP 259      | 10.5     | <i>Karnimata</i> sp.<br><i>Progonomys</i> sp.                                                                    | <i>Karnimata</i> sp.<br><i>Progonomys</i> sp.                                | morphotype 1                                                                     |

|                   |      |                                                      |                                                      |                       |
|-------------------|------|------------------------------------------------------|------------------------------------------------------|-----------------------|
| YGSP 797          | 11.2 | ? <i>Karnimata</i> sp.<br><i>Progonomys hussaini</i> | ? <i>Karnimata</i> sp.<br><i>Progonomys hussaini</i> |                       |
| YGSP 791          | 11.2 |                                                      | same as Y76                                          |                       |
| YGSP 809          | 11.3 |                                                      | same as Y76                                          |                       |
| YGSP 76           | 11.4 | <i>Progonomys hussaini</i>                           | <i>Progonomys hussaini</i>                           |                       |
| YGSP 634          | 12.3 | <i>Progonomys</i> sp.                                |                                                      | <i>Progonomys</i> sp. |
| YGSP 496          | 12.4 | near <i>Progonomys</i>                               | near <i>Progonomys</i>                               |                       |
| YGSP 825          | 12.8 |                                                      | <i>Antemus chinjiensis</i>                           |                       |
| YGSP 690          | 13.1 | <i>Antemus chinjiensis</i>                           | <i>Antemus chinjiensis</i>                           |                       |
| YGSP 718          | 13.2 | <i>Antemus chinjiensis</i>                           | <i>Antemus chinjiensis</i>                           |                       |
| YGSP 651          | 13.6 | <i>Antemus chinjiensis</i>                           | <i>Antemus chinjiensis</i>                           |                       |
| YGSP 430, 41      | 13.6 | <i>Antemus chinjiensis</i>                           | <i>Antemus chinjiensis</i>                           |                       |
| YGSP 59, 640, 641 | 13.7 | <i>Antemus chinjiensis</i>                           | <i>Antemus chinjiensis</i>                           |                       |
| YGSP 491          | 13.8 | <i>Antemus chinjiensis</i>                           | <i>Antemus chinjiensis</i>                           |                       |
