# Supplementary material for: Fossil Mice and Rats Show Isotopic Evidence of Niche Partitioning and Change in Dental Ecomorphology Related to Dietary Shift in Late Miocene of Pakistan
Source: PubMed Central journal article supplement (PMC3732283; doi:10.1371/journal.pone.0069308), 2013-08-02
Supplement: pone.0069308.s009.pdf [file pone.0069308.s009.pdf]

**Table S2.** Carbon isotope data summarized by age. Note that all data but YGSP 34415 are included in the descriptive statistics.

| Age (Ma)        | N   | $\delta^{13}\text{C}$ |     |       | Combined locality/age            |
|-----------------|-----|-----------------------|-----|-------|----------------------------------|
|                 |     | Mean                  | SD  | Range |                                  |
| Recent Pakistan | 16  | -5.8                  | 5.1 | 14.3  |                                  |
| Recent India    | 2   | -2.1                  | 0.0 | 0.0   |                                  |
| 7.4 to 6.5      | 50  | -6.3                  | 2.6 | 9.8   |                                  |
| 13.8 to 7.8     | 110 | -10.8                 | 1.3 | 6.0   |                                  |
| ~2.5 to ~1.8    | 11  | -4.3                  | 1.7 | 5.8   | loc. Kanthro, loc. Nadah         |
| 6.5             | 22  | -5.4                  | 2.2 | 8.1   |                                  |
| 7.4             | 25  | -6.6                  | 2.5 | 9.0   |                                  |
| 8.0             | 5   | -10.4                 | 1.1 | 2.6   |                                  |
| 8.2             | 19  | -10.5                 | 1.0 | 3.1   | YGSP 34415 removed as an outlier |
| 8.8             | 18  | -12.0                 | 1.0 | 3.5   | 8.7 Ma, 8.8 Ma                   |
| 9.0             | 4   | -10.0                 | 0.9 | 1.9   |                                  |
| 9.2             | 11  | -12.0                 | 0.8 | 2.5   |                                  |
| 10.1            | 10  | -9.6                  | 0.5 | 1.5   |                                  |
| 10.2            | 3   | -10.4                 | 0.2 | 0.4   |                                  |
| 10.5            | 10  | -11.0                 | 0.9 | 3.3   |                                  |
| 11.2            | 8   | -10.4                 | 0.8 | 2.4   |                                  |
| 11.4            | 10  | -10.6                 | 0.8 | 2.6   | 11.3 Ma, 11.4 Ma                 |
| 13.8            | 8   | -9.5                  | 0.9 | 3.3   |                                  |
