# Supplementary material for: Fossil Mice and Rats Show Isotopic Evidence of Niche Partitioning and Change in Dental Ecomorphology Related to Dietary Shift in Late Miocene of Pakistan
Source: PubMed Central journal article supplement (PMC3732283; doi:10.1371/journal.pone.0069308), 2013-08-02
Supplement: pone.0069308.s011.pdf [file pone.0069308.s011.pdf]

**Table S4.** Summary of linear regression analysis for  $\delta^{13}\text{C}$  values, VD index, and hypsodonty. Asterisks for  $p < 0.05$ .

| Clade                      | Dependent variable    | Independent variable | Slope | Intercept | R <sup>2</sup> | p       |
|----------------------------|-----------------------|----------------------|-------|-----------|----------------|---------|
| <i>Karnimata</i>           | delta <sup>13</sup> C | Age                  | -3.02 | 15.5      | 0.73           | <0.001* |
| " <i>Progonomys</i> clade" | delta <sup>13</sup> C | Age                  | -2.78 | 12.5      | 0.69           | <0.001* |
| <i>Karnimata</i>           | VD index              | Age                  | -0.09 | 2.91      | 0.56           | <0.001* |
| " <i>Progonomys</i> clade" | VD index              | Age                  | -0.02 | 2.12      | 0.02           | 0.22    |
| <i>Karnimata</i>           | Hypsodonty            | Age                  | 0.003 | 0.37      | <0.01          | 0.53    |
| " <i>Progonomys</i> clade" | Hypsodonty            | Age                  | 0.008 | 0.31      | 0.08           | 0.06    |
