# Supplementary material for: Fossil Mice and Rats Show Isotopic Evidence of Niche Partitioning and Change in Dental Ecomorphology Related to Dietary Shift in Late Miocene of Pakistan
Source: PubMed Central journal article supplement (PMC3732283; doi:10.1371/journal.pone.0069308), 2013-08-02
Supplement: pone.0069308.s012.pdf [file pone.0069308.s012.pdf]

**Table S5.** Results of Welch’s ANOVA for carbon isotope data in coexisting species at 7.4 Ma, 6.5 Ma, and Recent. Asterisks for  $p < 0.05$ .

| Age (Ma) | Species 1                   |    | Species 2                                |   | Species 3         |    | $p$     | Combined age   |
|----------|-----------------------------|----|------------------------------------------|---|-------------------|----|---------|----------------|
|          | Name                        | n  | Name                                     | n | Name              | n  |         |                |
| Recent   | <i>Golunda ellioti</i>      | 4  | <i>Rattus</i> sp. + <i>Millardia</i> sp. | 5 | <i>Mus</i> spp.   | 5  | <0.001* |                |
| 6.5      | <i>Parapelomys robertsi</i> | 4  | <i>Karnimata huxleyi</i>                 | 8 | <i>Mus auctor</i> | 10 | 0.001*  |                |
| 7.4      | <i>Karnimata</i> sp.        | 14 | <i>Progonomys</i> sp.                    | 8 | <i>Mus</i> sp.    | 4  | 0.003*  | 7.2 Ma, 7.4 Ma |
