# Supplementary material for: Fossil Mice and Rats Show Isotopic Evidence of Niche Partitioning and Change in Dental Ecomorphology Related to Dietary Shift in Late Miocene of Pakistan
Source: PubMed Central journal article supplement (PMC3732283; doi:10.1371/journal.pone.0069308), 2013-08-02
Supplement: pone.0069308.s014.pdf [file pone.0069308.s014.pdf]

**Table S7.** Summary of dental measurements of m1 in mm.

| Age<br>(Ma) | Species                                             | N  | Length | Width | Ln(length*width) |      |       | Combined age     |
|-------------|-----------------------------------------------------|----|--------|-------|------------------|------|-------|------------------|
|             |                                                     |    |        |       | Mean             | SD   | Range |                  |
| Recent      | <i>Golunda ellioti</i>                              | 5  | 2.65   | 1.77  | 1.54             | 0.07 | 0.17  |                  |
|             | <i>Rattus</i> sp.                                   | 2  | 2.74   | 1.57  | 1.46             | 0.12 | 0.17  |                  |
|             | <i>Millardia</i> sp.                                | 3  | 2.31   | 1.49  | 1.24             | 0.01 | 0.03  |                  |
|             | <i>Mus booduga</i>                                  | 4  | 1.44   | 0.87  | 0.21             | 0.03 | 0.08  |                  |
|             | <i>Mus saxicola</i>                                 | 1  | 1.71   | 1.09  | 0.62             |      |       |                  |
| 6.5         | <i>Parapelomys robertsi</i>                         | 4  | 2.43   | 1.61  | 1.36             | 0.03 | 0.08  |                  |
|             | <i>Karnimata huxleyi</i>                            | 8  | 1.85   | 1.19  | 0.78             | 0.13 | 0.40  |                  |
|             | <i>Mus auctor</i>                                   | 12 | 1.49   | 0.94  | 0.34             | 0.08 | 0.22  |                  |
| 7.4         | <i>Parapelomys</i> sp.                              | 1  | 2.22   | 1.50  | 1.20             |      |       | 7.2 Ma, 7.4 Ma   |
|             | <i>Karnimata</i> sp.                                | 17 | 1.94   | 1.26  | 0.89             | 0.09 | 0.35  |                  |
|             | <i>Progonomys</i> sp.                               | 11 | 1.68   | 1.04  | 0.56             | 0.15 | 0.46  |                  |
|             | <i>Mus</i> sp.                                      | 12 | 1.32   | 0.80  | 0.04             | 0.14 | 0.40  |                  |
| 8.2         | large <i>Karnimata</i> sp.                          | 2  | 2.43   | 1.45  | 1.26             | 0.04 | 0.06  | 8.0 Ma, 8.2 Ma   |
|             | <i>Karnimata</i> sp.                                | 10 | 2.16   | 1.38  | 1.09             | 0.08 | 0.25  |                  |
|             | <i>Progonomys</i> sp.                               | 12 | 1.52   | 0.93  | 0.34             | 0.11 | 0.34  |                  |
| 8.8         | large <i>Karnimata</i> sp.                          | 3  | 2.33   | 1.37  | 1.16             | 0.08 | 0.15  | 8.7 Ma, 8.8 Ma   |
|             | <i>Karnimata</i> sp.                                | 2  | 2.25   | 1.35  | 1.11             | 0.08 | 0.11  |                  |
|             | <i>Progonomys</i> sp.                               | 13 | 1.52   | 0.94  | 0.36             | 0.07 | 0.23  |                  |
| 9.2         | <i>Karnimata darwini</i>                            | 14 | 1.95   | 1.19  | 0.84             | 0.11 | 0.37  |                  |
|             | <i>Progonomys debruijini</i>                        | 7  | 1.36   | 0.84  | 0.13             | 0.09 | 0.24  |                  |
| 10.1        | <i>Karnimata</i> sp. + <i>Progonomys</i> sp.        | 20 | 1.67   | 1.01  | 0.52             | 0.10 | 0.32  |                  |
| 10.2        | <i>Karnimata</i> sp. + <i>Progonomys</i> sp.        | 7  | 1.60   | 0.96  | 0.42             | 0.12 | 0.33  |                  |
| 10.5        | <i>Karnimata</i> sp. + <i>Progonomys</i> sp.        | 18 | 1.60   | 0.97  | 0.43             | 0.10 | 0.42  |                  |
| 11.2        | <i>Progonomys hussaini</i> + ? <i>Karnimata</i> sp. | 15 | 1.59   | 0.98  | 0.44             | 0.15 | 0.44  |                  |
| 11.4        | <i>Progonomys hussaini</i>                          | 16 | 1.56   | 0.98  | 0.42             | 0.07 | 0.27  | 11.3 Ma, 11.4 Ma |
| 13.8        | <i>Antemus chinjiensis</i>                          | 10 | 1.52   | 0.94  | 0.36             | 0.10 | 0.36  |                  |
