# Supplementary material for: Fossil Mice and Rats Show Isotopic Evidence of Niche Partitioning and Change in Dental Ecomorphology Related to Dietary Shift in Late Miocene of Pakistan
Source: PubMed Central journal article supplement (PMC3732283; doi:10.1371/journal.pone.0069308), 2013-08-02
Supplement: pone.0069308.s016.pdf [file pone.0069308.s016.pdf]

**Table S9.** Means of hypsodonty measurements with 95 % bootstrap confidence intervals. Asterisks indicate hypsodonty values measured in specimens in wear stage III of Lazzari et al. (2008).

| Age (Ma) | Species                                             | N  | Mean  | Bootstrap confidence interval |       | Combined age              |
|----------|-----------------------------------------------------|----|-------|-------------------------------|-------|---------------------------|
|          |                                                     |    |       | Lower                         | Upper |                           |
| Recent   | <i>Goluda ellioti</i>                               | 1  | 0.42* |                               |       |                           |
|          | <i>Millardia</i> sp.                                | 1  | 0.45  |                               |       |                           |
|          | <i>Mus booduga</i>                                  | 1  | 0.37* |                               |       |                           |
| 6.5      | <i>Parapelomys robertsi</i>                         | 4  | 0.46  | 0.42                          | 0.47  |                           |
|          | <i>Karnimata huxleyi</i>                            | 6  | 0.39  | 0.38                          | 0.43  |                           |
|          | <i>Mus auctor</i>                                   | 5  | 0.36  | 0.35                          | 0.38  |                           |
| 7.4      | <i>Karnimata</i> sp.                                | 8  | 0.39  | 0.38                          | 0.42  |                           |
|          | <i>Progonomys</i> sp.                               | 5  | 0.37  | 0.35                          | 0.39  |                           |
|          | <i>Mus</i> sp.                                      | 5  | 0.36  | 0.35                          | 0.37  |                           |
| 8.2      | <i>Karnimata</i> sp. (+ large <i>Karnimata</i> sp.) | 8  | 0.38  | 0.37                          | 0.40  |                           |
|          | <i>Progonomys</i> sp.                               | 7  | 0.38  | 0.37                          | 0.39  |                           |
| 8.8      | <i>Progonomys</i> sp.                               | 5  | 0.39  | 0.38                          | 0.40  |                           |
| 9.2      | <i>Karnimata darwini</i>                            | 22 | 0.39  | 0.38                          | 0.40  |                           |
|          | <i>Progonomys debruijini</i>                        | 8  | 0.39  | 0.37                          | 0.40  |                           |
| 10.5     | <i>Progonomys</i> sp.                               | 9  | 0.38  | 0.37                          | 0.39  |                           |
| 11.2     | <i>Progonomys hussaini</i>                          | 7  | 0.40  | 0.38                          | 0.41  |                           |
| 11.4     | <i>Progonomys hussaini</i>                          | 7  | 0.37  | 0.36                          | 0.39  | 11.3 Ma, 11.4 Ma          |
| 13.0     | <i>Antemus chinjiensis</i>                          | 5  | 0.38  | 0.36                          | 0.40  | 12.8 Ma, 13.1 Ma, 13.2 Ma |
| 13.6     | <i>Antemus chinjiensis</i>                          | 9  | 0.36  | 0.34                          | 0.38  | 13.6 Ma, 13.7 Ma          |
