# Supplementary material for: Fossil Mice and Rats Show Isotopic Evidence of Niche Partitioning and Change in Dental Ecomorphology Related to Dietary Shift in Late Miocene of Pakistan
Source: PLoS One. 2013 Aug 2;8(8):e69308. doi: 10.1371/journal.pone.0069308 (PMC3732283; doi:10.1371/journal.pone.0069308)
Supplement: Table S3 — Results of ANCOVA between Karnimata and the “ Progonomys clade”. Asterisks for p<0.05. (PDF) [file pone.0069308.s010.pdf]

**Table S3.** Results of ANCOVA between *Karnimata* and the “*Progonomys* clade”. Asterisks for  $p < 0.05$ .

| Dependent variable    | Interaction                    |         | ANCOVA |
|-----------------------|--------------------------------|---------|--------|
|                       | Covariate:Categorical variable | $p$     | $p$    |
| delta <sup>13</sup> C | Age:Clade                      | 0.54    | 0.002* |
| VD index              | Age:Clade                      | <0.001* |        |
| Hypsodonty            | Age:Clade                      | 0.39    | 0.04*  |
