# Supplementary material for: Fossil Mice and Rats Show Isotopic Evidence of Niche Partitioning and Change in Dental Ecomorphology Related to Dietary Shift in Late Miocene of Pakistan
Source: PLoS One. 2013 Aug 2;8(8):e69308. doi: 10.1371/journal.pone.0069308 (PMC3732283; doi:10.1371/journal.pone.0069308)
Supplement: Table S6 — Results of the Games-Howell post-hoc test, associated with Table S5. The mean difference is expressed as a mean of species 1 minus that of species 2. Asterisks for p<0.05. (PDF) [file pone.0069308.s013.pdf]

**Table S6.** Results of the Games-Howell post-hoc test, associated with Table S5. The mean difference is expressed as a mean of species 1 minus that of species 2. Asterisks for  $p < 0.05$ .

| Age (Ma) | Species 1                                | Species 2                                | Mean difference | $p$     |
|----------|------------------------------------------|------------------------------------------|-----------------|---------|
| Recent   | <i>Golunda ellioti</i>                   | <i>Rattus</i> sp. + <i>Millardia</i> sp. | 12.6            | <0.001* |
|          | <i>Golunda ellioti</i>                   | <i>Mus</i> spp.                          | 4.5             | 0.01*   |
|          | <i>Rattus</i> sp. + <i>Millardia</i> sp. | <i>Mus</i> spp.                          | -8.1            | <0.001* |
| 6.5      | <i>Parapelomys robertsi</i>              | <i>Karnimata huxleyi</i>                 | -4.3            | 0.001*  |
|          | <i>Parapelomys robertsi</i>              | <i>Mus auctor</i>                        | -2.4            | 0.02*   |
|          | <i>Karnimata huxleyi</i>                 | <i>Mus auctor</i>                        | 1.8             | 0.11    |
| 7.4      | <i>Karnimata</i> sp.                     | <i>Progonomys</i> sp.                    | 0.8             | 0.76    |
|          | <i>Karnimata</i> sp.                     | <i>Mus</i> sp.                           | 3.5             | 0.002*  |
|          | <i>Progonomys</i> sp.                    | <i>Mus</i> sp.                           | 2.6             | 0.08    |
