# Supplementary material for: Fossil Mice and Rats Show Isotopic Evidence of Niche Partitioning and Change in Dental Ecomorphology Related to Dietary Shift in Late Miocene of Pakistan
Source: PLoS One. 2013 Aug 2;8(8):e69308. doi: 10.1371/journal.pone.0069308 (PMC3732283; doi:10.1371/journal.pone.0069308)
Supplement: Table S8 — Means of VD index with 95 % bootstrap confidence intervals. (PDF) [file pone.0069308.s015.pdf]

**Table S8.** Means of VD index with 95 % bootstrap confidence intervals.

| Age (Ma) | Species                                             | N  | Mean | Bootstrap confidence interval |       | SD   | Combined age              |
|----------|-----------------------------------------------------|----|------|-------------------------------|-------|------|---------------------------|
|          |                                                     |    |      | Lower                         | Upper |      |                           |
| Recent   | <i>Golunda ellioti</i>                              | 3  | 2.52 |                               |       | 0.06 |                           |
|          | <i>Rattus</i> sp.                                   | 3  | 2.36 |                               |       | 0.19 |                           |
|          | <i>Millardia</i> sp.                                | 3  | 2.59 |                               |       | 0.16 |                           |
|          | <i>Mus</i> spp.                                     | 5  | 2.01 |                               |       | 0.08 |                           |
| 6.5      | <i>Parapelomys robertsi</i>                         | 5  | 2.54 | 2.50                          | 2.59  |      |                           |
|          | <i>Karnimata huxleyi</i>                            | 10 | 2.29 | 2.24                          | 2.33  |      |                           |
|          | <i>Mus auctor</i>                                   | 13 | 2.02 | 1.98                          | 2.08  |      |                           |
| 7.4      | <i>Karnimata</i> sp.                                | 13 | 2.30 | 2.25                          | 2.35  |      |                           |
|          | <i>Progonomys</i> sp.                               | 8  | 1.96 | 1.93                          | 2.00  |      |                           |
|          | <i>Mus</i> sp.                                      | 9  | 1.77 | 1.72                          | 1.86  |      |                           |
| 8.2      | <i>Karnimata</i> sp. (+ large <i>Karnimata</i> sp.) | 14 | 2.13 | 2.09                          | 2.18  |      |                           |
|          | <i>Progonomys</i> sp.                               | 11 | 1.95 | 1.91                          | 1.98  |      |                           |
| 8.8      | <i>Karnimata</i> sp. (+ large <i>Karnimata</i> sp.) | 5  | 2.12 | 2.04                          | 2.17  |      |                           |
|          | <i>Progonomys</i> sp.                               | 14 | 1.99 | 1.94                          | 2.05  |      |                           |
| 9.2      | <i>Karnimata darwini</i>                            | 33 | 2.07 | 2.04                          | 2.10  |      |                           |
|          | <i>Progonomys debruijini</i>                        | 15 | 1.97 | 1.89                          | 2.04  |      |                           |
| 10.1     | <i>Karnimata</i> sp.                                | 9  | 2.01 | 1.95                          | 2.06  |      |                           |
| 10.5     | <i>Karnimata</i> sp.                                | 11 | 1.95 | 1.91                          | 2.01  |      | 10.2 Ma, 10.5 Ma          |
|          | <i>Progonomys</i> sp.                               | 12 | 1.95 | 1.90                          | 1.99  |      |                           |
| 11.2     | <i>Progonomys hussaini</i>                          | 9  | 2.02 | 1.99                          | 2.06  |      |                           |
|          | ? <i>Karnimata</i> sp.                              | 6  | 2.15 | 2.08                          | 2.21  |      |                           |
| 11.4     | <i>Progonomys hussaini</i>                          | 21 | 2.00 | 1.93                          | 2.07  |      | 11.3 Ma, 11.4 Ma          |
| 11.6     | <i>Progonomys hussaini</i>                          | 5  | 1.97 | 1.88                          | 2.12  |      | 11.5 Ma, 11.6 Ma, 12.3 Ma |
| 12.4     | near <i>Progonomys</i>                              | 5  | 2.05 | 1.97                          | 2.15  |      |                           |
| 13.0     | <i>Antemus chinjiensis</i>                          | 7  | 2.02 | 1.95                          | 2.07  |      | 12.8 Ma, 13.1 Ma, 13.2 Ma |
| 13.6     | <i>Antemus chinjiensis</i>                          | 14 | 1.99 | 1.95                          | 2.03  |      | 13.6 Ma, 13.7 Ma          |
| 13.8     | <i>Antemus chinjiensis</i>                          | 12 | 2.02 | 1.97                          | 2.07  |      |                           |
